# Supplementary material for: Halogen bonding. The role of the polarizability of the electron-pair donor
Source: Royal Society of Chemistry journal article supplement (doi:10.1039/c5cp07941a), 2016-01-01

## Supporting Information

### Halogen bonding. The role of polarizability of the electron-pair donor

*Darío J. R. Duarte,<sup>a</sup> Gladis L. Sosa,<sup>b</sup> Nélide M. Peruchena,<sup>a</sup> and Ibon Alkorta<sup>c</sup>*

<sup>a</sup>Laboratorio de Estructura Molecular y Propiedades, Área de Química Física, Departamento de Química, Facultad de Ciencias Exactas y Naturales y Agrimensura, Universidad Nacional del Nordeste, Avda. Libertad 5460, (3400) Corrientes, Argentina.

<sup>b</sup>Laboratorio de Química Teórica y Experimental, Departamento de Química. Facultad Regional Resistencia, Universidad Tecnológica Nacional, French 414, (3500) Resistencia, Chaco, Argentina.

<sup>c</sup>Instituto de Química Médica, CSIC, Juan de la Cierva, 3, E-28006 Madrid, Spain.

\* Corresponding author:

Darío J. R. Duarte, e-mail: [djr\\_duarte@hotmail.com](mailto:djr_duarte@hotmail.com)

#### Contents

Pg. S2 Figure S1. Correlations between the binding energy and polarizabilities perpendicular,  $\alpha_{\perp}$  (a), parallel,  $\alpha_{\parallel}$  (b), and spherical,  $\alpha_s$  (c).

Pg. S2 Figure S2. Envelopes of the function  $L(\mathbf{r})=0.0016$  au for F–Br $\cdots$ Br–F complex.

Figure S1. Correlations between the binding energy and polarizabilities perpendicular,  $\alpha_{\perp}$ (a), parallel,  $\alpha_{\parallel}$  (b), and spherical,  $\alpha_S$  (c).

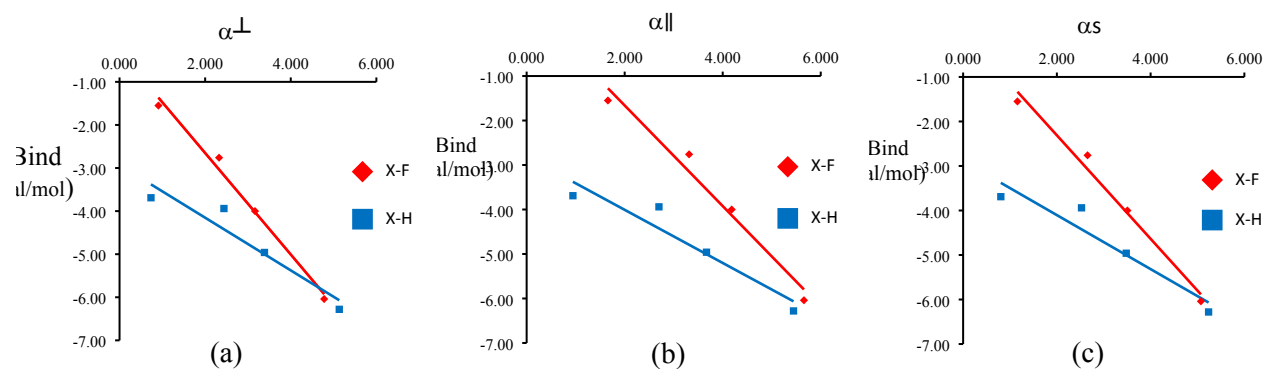

Figure S2. Envelopes of the function  $L(\mathbf{r})=0.0016$  au for F-Br $\cdots$ Br-F complex.

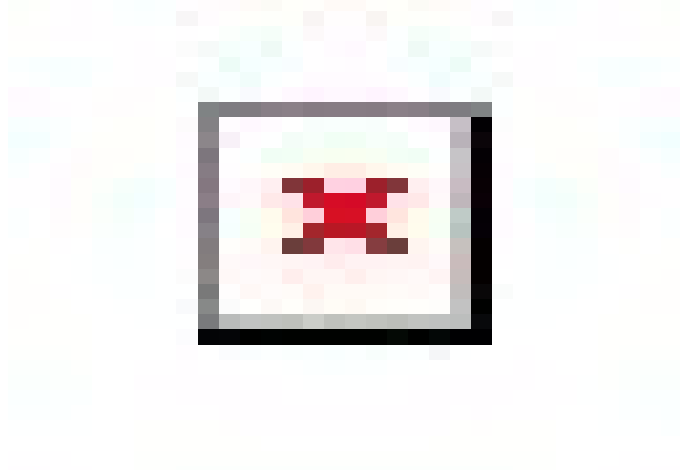

Supplement: c5cp07941a1.pdf [file c5cp07941a1.pdf]
